# Supplementary material for: School-Age Language and Literacy Intervention: PromotingFunctional Relevance
Source: Royal Society of Chemistry journal article supplement (doi:10.1039/d3ra07193f), 2011-01-01
Supplement: d3ra07193f1.pdf [file d3ra07193f1.pdf]

## Reagents and Instruments

**Experimental reagents:** MEA, analytically pure, was purchased from Aladdin Reagents; n-Butanol, analytically pure, was purchased from Aladdin Reagents; n-Propanol, analytically pure, was purchased from Aladdin Reagents; Isopropanol, analytically pure, purchased from Tianjin Xinbote Chemical Co; Tert-butanol, analytically pure, purchased from Tianjin Xinbute Chemical Co; Hydrochloric acid, 99.7%, Tianjin Zhiyuan Chemical Reagent Co; Deionized water, homemade in the laboratory; CO<sub>2</sub>, 99.99%, purchased from Hepu Beifen Gas Industry Co., Ltd. N<sub>2</sub>, 99.99%, purchased from Beijing Hepu Beifen Gas Industry Co., Ltd. D<sub>2</sub>O(99.96%), purchased from National Pharmaceutical Chemical Reagent Co., Ltd for nuclear magnetic resonance experiments.

**Experimental equipment:** Digital Viscometer, NDJ-9S, Bangxi Instrument Technology (Shanghai) Co., Ltd; Analytical Balance, GL2202i, Shanghai Li Chen Bang Xi Instrument Technology Co, Ltd; Collector Type Constant Temperature Heating Magnetic Stirrer, DF-101S, Shanghai Li Chen Bang Xi Instrument Technology Co, Ltd; Rotor Flow Meter, LZB-3WB, Changzhou Shuanghuan Thermal Instrument Co, Ltd; Low-temperature coolant circulating pump, DLSB-5/10, Zhengzhou Great Wall Science and Industry Trade Co, Ltd; CO<sub>2</sub> load titration device, self-made in the laboratory; Temperature-controlled Magnetic Stirrer, Jiangsu Jinyi Instrument Science and Technology Co, Ltd; Electrothermal Constant Temperature Blast Drying Oven, DHG-9023A, Shanghai Yiheng Technology Instrument Co., Ltd.
